# Supplementary material for: Genetic Architecture of Maize Stalk Diameter and Rind Penetrometer Resistance in a Recombinant Inbred Line Population
Source: Genes (Basel). 2022 Mar 24;13(4):579. doi: 10.3390/genes13040579 (PMC9032882; doi:10.3390/genes13040579)
Supplement: Supplementary file 1 [file genes-13-00579-s001.zip]

Archive with 4 entries (4 files):
- Figures S1-S5.pdf
- Table S1 Primer sequences used in this study..xlsx
- Table S2 QTL clusters for SD and RPR in four environments..xlsx
- Table S3 Maize cell wall biosynthesis genes in the confidence intervals of RPR-related QTLs..xlsx
