# Supplementary material for: Genetic Architecture of Maize Stalk Diameter and Rind Penetrometer Resistance in a Recombinant Inbred Line Population
Source: Genes (Basel). 2022 Mar 24;13(4):579. doi: 10.3390/genes13040579 (PMC9032882; doi:10.3390/genes13040579)
Supplement: Supplementary file 1 [file genes-13-00579-s001.zip › Table S1 Primer sequences used in this study..xlsx]

## Sheet: Sheet1
Table S1 Primer sequences used in this study
Marker	Left primer	Right primer	Position
M1	CTGAGCGCCATCTGAAATTA	GAACATTACGGCAGAGGAAA	114569972
M2	TGTCGTGTGTCATCTCGTTA	TGGTGCAGAGTATCGTCAG	117064553
M3	GCTGCCCCATTTTCTTGATA	TAGATGACTGATTGGGGTCC	117401812
M4	AACAAGGGTAGGCATCGGGAGA	CGAAAGGCAGCGTGGAAGG	118164550
M5	TCCAAGTGCAATCAAGTTGT	ACCTCCATTAAGTTCATCGC	121518779
M6	ATAATAAGCGTGTTGAGCCC	TGGACCTTACTCTTCCATCC	129725325
M7	TAAGAGGCACCCGACATATT	ATGTTTGGTCAGTATTGGGC	131493044
M8	TACCACTGTTGGTTTCCTTC	AGTTTGTTATGTAAACTAGGAGCA	132233168
