# Supplementary material for: Genetic Architecture of Maize Stalk Diameter and Rind Penetrometer Resistance in a Recombinant Inbred Line Population
Source: Genes (Basel). 2022 Mar 24;13(4):579. doi: 10.3390/genes13040579 (PMC9032882; doi:10.3390/genes13040579)
Supplement: Supplementary file 1 [file genes-13-00579-s001.zip › Table S2 QTL clusters for SD and RPR in four environments..xlsx]

## Sheet: Sheet1
Table S2 QTL clusters for SD and RPR in four environments.
Trait	Cluster Name	Interval(Mb)	No. of QTLs	Trait	QTL	Chr.	Env.	LOD	PVE(%)	A	Peak(cM)	Peak(Mb)	Interval (cM)	Physical location (Mb)
SD				SD4	q4SD2-1	2	E1	5.09663	9.5868	-0.7737	25.71	4.28	23.10-31.20	3.88-6.16
	Cluster-SD2-1	217.21-226.88	2	SD2	q2SD2-1	2	E1	3.42237	6.8578	-0.5989	182.61	215.37	181.90-190.60	215.16-220.88
							BLUP	2.8165	4.8859	-0.2202	194.51	224.43	187.40-198.10	217.21-225.33
				SD3	q3SD2-1	2	E1	3.12704	6.1592	-0.5949	195.51	224.43	191.60-199.90	221.4-226.88
				SD4	q4SD3-1	3	E4	2.82302	4.7605	-0.5142	21.31	3.14	20.30-22.30	3.09-4.76
	Cluster-SD3-1	25.35-45.72	2	SD3	q3SD3-1	3	E1	2.92074	5.4558	0.5638	72.01	30.98	68.80-81.40	25.35-45.72
				SD4	q4SD3-2	3	E1	2.7557	5.4671	0.5564	72.01	30.98	71.80-80.50	29.43-44.15
				SD4	q4SD3-3	3	BLUP	3.28773	5.6768	0.2424	85.91	55.4	81.90-88.90	45.73-102.71
	Cluster-SD3-2	164.41-168.77	2	SD3	q3SD3-2	3	E2	4.47557	9.2604	0.7749	122.01	167.66	120.80-122.80	164.41-168.35
				SD4	q4SD3-4	3	E4	2.70358	4.9373	0.5047	124.21	168.35	123.50-125.10	167.66-168.77
				SD2	q2SD3-1	3	BLUP	3.0684	4.82	0.2136	150.31	182.51	148.50-152.00	181.14-183.88
	Cluster-SD5-1	218.52-221.52	3	SD2	q2SD5-1	5	E2	3.48751	7.1563	-0.6481	294.31	220.94	291.80-301.20	220.49-221.52
				SD3	q3SD5-1	5	E2	3.14875	6.3167	-0.5996	299.41	221.36	293.80-301.20	220.49-221.52
				SD4	q4SD5-1	5	E2	3.05103	7.1301	-0.6024	294.31	220.94	281.80-300.90	218.52-221.52
	Cluster-SD6-1	141.26-152.61	3	SD2	q2SD6-1	6	BLUP	3.23996	5.1384	0.2216	101.91	144.58	101.10-104.90	143.82-151.51
				SD3	q3SD6-1	6	E3	3.69598	5.9818	0.3586	103.81	149.26	99.10-108.40	141.26-152.61
							BLUP	3.34419	5.2905	0.2245	103.81	149.26	101.10-104.90	143.82-151.51
				SD4	q4SD6-1	6	E3	3.63301	5.4089	0.3304	103.81	149.26	99.60-108.70	141.26-152.61
				SD2	q2SD6-2	6	E4	2.68404	5.0576	0.5332	135.81	162.43	135.20-136.90	161.55-162.81
				SD2	q2SD7-1	7	E2	2.58415	5.165	-0.5471	56.51	8.76	56.00-57.00	8.52-9.14
	Cluster-SD7-1	13.64-21.49	3	SD2	q2SD7-2	7	E3	3.13355	5.381	0.3466	68.81	15.41	66.20-70.10	13.64-18.33
				SD3	q3SD7-1	7	E3	3.35288	5.3892	0.3386	68.81	15.41	66.00-70.80	13.64-21.49
				SD4	q4SD7-1	7	E3	3.58958	5.3332	0.326	68.81	15.41	65.30-70.20	13.64-21.49
	Cluster-SD7-2	157.09-162.19	3	SD2	q2SD7-3	7	BLUP	4.85994	7.9348	0.2733	167.21	161.42	165.50-170.50	159.78-162.19
				SD3	q3SD7-2	7	E1	3.37459	6.3066	0.5909	167.21	161.42	161.30-170.50	158.52-162.19
							BLUP	5.30293	8.6618	0.2893	167.21	161.42	165.40-170.30	159.78-162.19
				SD4	q4SD7-2	7	E4	3.23996	5.9172	0.5463	167.21	161.42	166.50-169.60	160.9-162.19
							BLUP	5.85668	9.6954	0.3119	167.21	161.42	159.10-171.10	157.09-162.19
	Cluster-SD7-3	175.63-180.75	3	SD2	q2SD7-4	7	E4	3.28339	6.2525	0.6063	236.51	177.96	234.50-238.80	177.67-178.65
							BLUP	3.63735	5.9256	0.2377	236.51	177.96	233.00-246.90	178.65-180.75
				SD3	q3SD7-3	7	E4	3.39196	6.3445	0.6088	222.21	175.02	221.50-225.00	175.63-176.82
				SD4	q4SD7-3	7	E4	3.24647	5.8783	0.5404	222.21	175.02	221.30-229.60	175.63-179.03
	Cluster-SD8-1	145.83-164.25	2	SD2	q2SD8-1	8	E4	2.84256	4.1901	0.1984	141.81	162.92	138.70-143.80	161.26-164.25
				SD3	q3SD8-1	8	E1	3.36374	6.3356	0.6103	119.31	145.98	118.80-130.60	145.83-154.57
							E4	2.91857	5.461	0.5539	141.71	162.92	137.90-144.40	161.02-164.25
							BLUP	3.28556	6.1714	0.5937	128.71	150.93	126.60-142.70	150.21-163.87
	Cluster-SD9-1	38.64-103.86	2	SD3	q3SD9-1	9	E1	4.52552	8.424	-0.6838	100.81	85.54	90.40-110.40	36.17-103.21
							E4	3.77633	7.1372	-0.6494	101.41	92.35	91.20-110.20	38.64-103.21
							BLUP	5.09446	8.141	-0.3457	100.81	85.54	91.00-108.60	37.79-100.82
				SD4	q4SD9-1	9	E4	5.62215	10.4358	-0.7267	101.41	91.64	97.60-113.60	70.77-105.86
							BLUP	3.35939	5.3241	-0.2708	100.81	85	99.20-105.80	82.57-94.9
	Cluster-SD9-2	114.3-131.5	3	SD2	q2SD9-1	9	E1	6.51249	13.6501	-1.1618	136.31	125.77	135.60-139.10	121.73-129.87
							E2	3.15961	6.4386	-0.6135	129.41	117.68	128.00-137.20	117.07-127.65
							E3	9.69164	18.0927	-0.6343	136.31	125.77	129.20-139.90	117.68-130.34
							BLUP	6.02823	9.9912	-0.3094	136.31	125.77	129.00-139.00	117.07-129.87
				SD3	q3SD9-2	9	E2	4.05646	8.1811	-0.68	136.31	125.77	128.40-139.00	117.07-129.87
							E3	9.69598	16.8382	-0.6	135.81	124.08	124.80-146.20	114.3-131.5
							BLUP	3.96743	6.6729	-0.4162	137.11	127	136.40-139.70	125.77-129.87
				SD4	q4SD9-2	9	E2	5.59826	11.551	-0.818	136.31	125.77	128.60-146.60	117.07-131.5
							E3	12.975	21.7242	-0.6581	136.31	125.77	124.50-146.40	114.3-131.5
							BLUP	2.90988	4.6243	-0.2566	135.81	122.42	135.00-138.80	121.73-129
				SD2	q2SD10-1	10	E3	2.82519	4.8518	0.336	83.61	133.44	83.60-84.70	133.44-138.54
	Cluster-SD10-1	126.32-138.54	2	SD3	q3SD10-1	10	E3	3.12486	5.0079	0.3304	40.31	8.79	39.30-42.90	5.9-10.42
				SD4	q4SD10-1	10	E3	4.44734	6.685	0.3744	83.61	133.44	80.00-90.50	126.32-138.54
RPR	Cluster-RPR1-1	186.38-214.51	4	RPR2	q2RPR1-2	1	E2	5.39631	9.8014	17.2474	259.41	211.12	251.20-264.00	202.08-214.25
				RPR2	q2RPR1-1	1	BLUP	2.78176	4.0312	7.5203	240.71	197.5	238.90-241.30	194.7-197.84
				RPR3	q3RPR1-1	1	E1	4.89902	8.9271	13.2522	239.11	195.09	228.90-250.90	186.38-203.7
							E2	4.17807	8.0471	15.3944	253.51	204.96	237.00-256.00	193.34-208.08
							BLUP	2.7405	4.242	6.4149	240.41	197.05	240.10-247.00	195.68-201.74
				RPR4	q4RPR1-1	1	E2	3.50706	6.3841	12.494	260.21	210.46	250.90-265.10	203.7-214.51
	Cluster-RPR1-2	219.09-227.88	2	RPR2	q2RPR1-3	1	E1	5.0532	9.0426	14.8473	275.21	220.78	274.60-280.60	219.09-225.03
							BLUP	2.98589	4.3116	7.697	275.81	222.27	274.40-278.50	219.09-223.6
				RPR4	q4RPR1-2	1	BLUP	3.60043	5.0744	6.1387	275.81	219.76	274.10-282.10	219.09-227.88
				RPR4	q4RPR1-3	1	E3	3.37025	5.3755	10.3594	327.21	262.09	317.40-330.20	255.17-263.52
	Cluster-RPR2-1	11.17-19.71	3	RPR2	q2RPR2-1	2	E2	3.83279	7.6588	15.5753	69.41	16.39	63.10-73.70	12.57-19.34
							E3	2.76439	4.9215	17.5503	72.51	18.76	64.90-73.70	12.57-19.34
							E4	4.87514	8.9448	14.1742	65.01	15.01	61.70-70.90	12.57-18.31
							BLUP	7.55049	12.3776	13.2385	65.01	15.01	61.40-72.90	12.57-19.34
				RPR3	q3RPR2-1	2	E2	6.26927	12.9525	22.5533	65.01	15.01	61.00-68.90	15.01-18.31
							E3	7.24864	12.4692	17.8062	65.01	15.01	61.50-73.70	12.57-19.34
							E4	6.34311	11.6335	12.8513	65.01	15.01	61.90-68.60	12.57-18.31
							BLUP	10.1868	17.2543	12.9113	65.01	15.01	54.00-75.70	11.17-19.71
				RPR4	q4RPR2-1	2	E2	4.57329	8.5697	14.7618	65.11	15.01	61.50-70.00	12.57-18.31
							E3	5.38328	8.9171	13.5002	65.01	15.01	60.10-71.20	12.57-18.31
							E4	6.28665	11.875	11.5915	65.01	15.01	61.20-73.50	12.57-19.34
							BLUP	8.56677	14.1074	10.3415	65.01	15.01	57.00-75.70	12.24-19.71
	Cluster-RPR2-2	41.24-59.84	3	RPR2	q2RPR2-2	2	E1	3.07709	5.4234	11.5507	99.11	43.98	96.80-102.50	41.24-55.85
				RPR3	q3RPR2-2	2	E1	3.07057	5.5758	10.4105	99.71	49.26	98.70-104.40	43.54-59.84
				RPR4	q4RPR2-2	2	E1	4.85559	9.3742	12.8401	99.71	49.26	98.70-104.30	43.54-57.89
	Cluster-RPR3-1	21-163.19	5	RPR2	q2RPR3-1	3	E1	2.91857	5.1655	11.6058	71.11	29.43	70.10-72.00	27.55-33.2
							BLUP	7.14875	11.7067	13.1871	71.11	29.43	60.60-80.90	16.96-45.43
				RPR2	q2RPR3-2	3	E2	6.51466	11.7161	20.04	105.91	153.57	94.60-115.10	128.63-163.19
							E4	3.78067	6.9051	12.7038	103.11	149.05	93.10-109.40	119.21-158.12
				RPR3	q3RPR3-1	3	E2	4.03909	7.7478	16.3176	65.51	22.67	64.60-73.50	21-32.39
							BLUP	4.60152	7.265	8.584	71.11	29.43	65.60-76.50	27.55-37.81
				RPR3	q3RPR3-2	3	E3	4.35614	7.2903	13.8535	88.41	63.86	78.00-98.30	38.78-140.85
				RPR4	q4RPR3-1	3	E2	4.7405	8.7275	15.553	71.11	29.43	65.10-81.40	21-54
							E1	3.94788	7.5423	11.856	88.41	63.86	77.70-90.30	38.78-114.25
							BLUP	5.50271	8.6639	8.2442	89.51	108.5	80.90-99.80	44.15-142.88
				RPR4	q4RPR3-2	3	E3	4.2823	6.9388	11.6996	130.41	172.48	124.50-135.60	168.35-175.09
				RPR4	q4RPR4-1	4	E3	2.58198	3.8305	8.7655	42.21	10.45	42.10-42.50	6.09-10.76
				RPR3	q3RPR4-1	4	E3	2.68838	4.4068	10.6644	188.61	230.7	187.90-189.40	226.19-231.58
				RPR2	q2RPR4-1	4	E3	2.76221	5.0732	17.374	192.61	231.9	192.00-193.60	231.9-235.51
	Cluster-RPR5-1	19.66-51.91	2	RPR2	q2RPR5-1	5	E1	4.28882	7.6515	-13.7097	89.81	26.06	85.90-101.70	19.66-36.42
				RPR3	q3RPR5-1	5	E1	5.29642	9.8015	-13.8321	104.51	41.98	93.40-107.40	31.81-51.91
	Cluster-RPR5-2	68.35-145.91	3	RPR2	q2RPR5-2	5	E2	6.37351	11.373	-18.5824	128.91	82.97	122.70-139.20	76.22-145.91
							BLUP	5.2747	8.4018	-10.9658	128.91	82.97	119.00-138.90	68.75-145.91
				RPR3	q3RPR5-2	5	E2	3.73073	7.0329	-14.3261	128.41	82.99	118.40-133.50	68.35-93.1
								2.84473	4.1088	-6.2862	128.91	82.97	126.50-130.60	70.34-88.29
				RPR4	q4RPR5-1	5	E2	5.25733	9.5125	-15.3162	128.91	82.97	121.90-132.70	72.79-95.1
				RPR3	q3RPR6-1	6	E1	2.93811	5.3077	-10.2803	58.81	95.99	58.30-59.60	95.86-98.07
				RPR2	q2RPR6-1	6	E4	2.75787	4.9312	-10.4912	96.31	136.98	90.20-97.50	133.53-141.26
				RPR4	q4RPR6-1	6	E1	3.29425	6.1077	-10.3035	123.41	158.32	117.60-125.30	155.77-159.37
							E3	3.27036	5.1322	-10.2999	116.41	155.77	112.80-122.90	153.76-158.32
	Cluster-RPR6-1	159.53-165.36	3	RPR2	q2RPR6-2	6	BLUP	3.47014	5.4084	-8.7591	134.71	161.55	132.70-137.00	160.9-162.81
				RPR3	q3RPR6-2	6	E3	2.94897	4.8529	-11.1517	134.71	161.55	133.70-136.00	160.9-162.81
							BLUP	5.63518	8.9382	-9.2722	135.81	162.43	130.60-144.80	159.79-165.36
				RPR4	q4RPR6-2	6	BLUP	5.08361	7.9375	-7.6937	135.81	162.43	127.80-137.80	159.53-162.81
	Cluster-RPR7-1	148.97-162.19	4	RPR2	q2RPR7-1	7	E4	3.15961	5.6628	11.1565	159.21	157.7	156.00-160.40	155-158.52
							BLUP	4.76004	7.6108	10.2643	158.51	157.7	147.50-166.30	151.21-160.9
				RPR3	q3RPR7-1	7	E3	4.38219	7.3278	13.5	159.21	157.7	156.00-171.40	155-162.19
				RPR4	q4RPR7-1	7	E4	3.37894	6.0859	8.3465	146.81	151.21	142.60-148.20	148.97-152.57
				RPR4	q4RPR7-2	7	E3	3.1987	4.7121	9.6336	159.21	157.7	158.00-169.20	157.09-162.19
				RPR2	q2RPR8-1	8	E3	3.24213	6.3873	19.6817	174.31	173.03	171.10-177.20	171.99-174.33
	Cluster-RPR9-1	1.84-6.79	3	RPR2	q2RPR9-1	9	BLUP	2.88599	4.1736	7.639	5.31	4.44	1.80-7.20	1.84-5.08
				RPR3	q3RPR9-1	9	BLUP	2.8013	4.3384	6.4468	5.31	4.44	2.70-7.20	3.99-5.08
				RPR4	q4RPR9-1	9	E3	3.09012	4.9362	9.8222	5.31	4.44	2.50-12.50	1.84-6.79
							BLUP	3.78502	5.9082	6.5541	2.41	3.99	1.20-8.80	2.79-6.69
				RPR4	q4RPR9-2	9	E1	3.76764	7.0518	-11.0637	96.91	70.77	87.10-106.80	30.77-96.81
	Cluster-RPR10-1	17.92-90.13	3	RPR2	q2RPR10-1	10	E3	3.68078	6.7138	20.6866	60.61	39.07	56.20-67.30	19.92-90.13
				RPR3	q3RPR10-1	10	E3	2.94245	4.4971	10.8934	60.61	39.07	56.00-65.70	17.92-86.46
				RPR4	q4RPR10-1	10	E3	5.57003	9.1817	13.7686	60.61	39.07	56.40-67.10	19.92-90.13
							BLUP	2.83605	4.3426	5.7234	62.81	72.23	59.00-63.10	27.25-76.55
	Cluster-RPR10-2	145.22-146.56	3	RPR2	q2RPR10-2	10	E4	2.68187	4.8297	10.4714	129.81	145.97	128.00-130.50	145.56-146.56
				RPR3	q3RPR10-2	10	E4	2.73181	5.0729	8.5565	127.31	145.56	126.20-130.10	145.47-146.56
				RPR4	q4RPR10-2	10	E1	2.62106	4.5753	8.9556	129.81	145.97	129.70-130.60	145.97-146.56
							E4	3.69598	7.0966	9.1489	128.31	145.97	125.30-132.30	145.22-146.56
Chr., chromosome. PVE, Phenotypic variation explained by each QTL. A, Additive effect. Interval, confidence interval.
