# Supplementary material for: Genetic Architecture of Maize Stalk Diameter and Rind Penetrometer Resistance in a Recombinant Inbred Line Population
Source: Genes (Basel). 2022 Mar 24;13(4):579. doi: 10.3390/genes13040579 (PMC9032882; doi:10.3390/genes13040579)
Supplement: Supplementary file 1 [file genes-13-00579-s001.zip › Table S3 Maize cell wall biosynthesis genes in the confidence intervals of RPR-related QTLs..xlsx]

## Sheet: Sheet1
Table S3 Maize cell wall biosynthesis genes in the confidence intervals of RPR-related QTLs
QTL/Cluster Name	Gene ID	Chr	Start	End	Gene family
Cluster-RPR1-1	Zm00001d031488	1	191775035	191776945	CCR gene family
	Zm00001d031524	1	192826347	192827797	CesA/Csl superfamily
	Zm00001d031635	1	194570543	194573688	Peroxidases gene family
	Zm00001d031577	1	195092276	195093628	PGases gene family
	Zm00001d031802	1	202214939	202217025	CCR gene family
	Zm00001d031839	1	203326138	203327986	PGases gene family
	Zm00001d031904	1	206156272	206157117	Expansin gene family
	Zm00001d031906	1	206261034	206261843	Expansin gene family
	Zm00001d031907	1	206384948	206385757	Expansin gene family
	Zm00001d032083	1	212104378	212105884	COMT gene family
	Zm00001d032100	1	212823128	212826208	UGD, UDP-GlcA decarboxylase, UGE, UXE, GMD
	Zm00001d032103	1	213126776	213129233	4CL gene family
	Zm00001d032107	1	213151287	213157154	4CL gene family
	Zm00001d032148	1	214491081	214496190	HCT gene family
Cluster-RPR1-2	Zm00001d032405	1	222203896	222206239	Peroxidases gene family
	Zm00001d032346	1	223326874	223334279	PGases gene family
	Zm00001d032387	1	225072691	225076056	CesA/Csl superfamily
	Zm00001d032467	1	227648295	227649464	C3’H, C4H, F5H
q4RPR1-3	Zm00001d033231	1	255266246	255275500	Expansin gene family
	Zm00001d033286	1	257622515	257624760	PAL gene family
Cluster-RPR2-1	Zm00001d002370	2	11175858	11179354	HCT gene family
	Zm00001d002409	2	12116462	12118240	XTH superfamily
	Zm00001d002410	2	12121541	12122951	XTH superfamily
	Zm00001d002412	2	12176650	12177961	XTH superfamily
	Zm00001d002548	2	15188664	15192121	Expansin gene family
	Zm00001d002609	2	16657272	16658702	GT47 superfamily
Cluster-RPR2-2	Zm00001d003431	2	44205146	44207351	UGD, UDP-GlcA decarboxylase, UGE, UXE, GMD
	Zm00001d003617	2	50619615	50621030	UGD, UDP-GlcA decarboxylase, UGE, UXE, GMD
	Zm00001d003707	2	53615948	53617577	Peroxidases gene family
	Zm00001d003676	2	53788115	53792899	CesA/Csl superfamily
	Zm00001d003702	2	55231147	55233488	4CL gene family
Cluster-RPR3-1	Zm00001d039947	3	20216143	20227371	HCT gene family
	Zm00001d039951	3	20366779	20367924	HCT gene family
	Zm00001d039956	3	20568290	20571434	HCT gene family
	Zm00001d040069	3	25782277	25782778	GT47 superfamily
	Zm00001d040188	3	31148377	31151382	HCT gene family
	Zm00001d040247	3	33681248	33682108	Expansin gene family
	Zm00001d040249	3	33801129	33802069	Expansin gene family
	Zm00001d040364	3	40528179	40530723	Peroxidases gene family
	Zm00001d040379	3	40803245	40804697	Expansin gene family
	Zm00001d040399	3	41741731	41743930	Peroxidases gene family
	Zm00001d040578	3	51165509	51166814	Peroxidases gene family
	Zm00001d040589	3	51740462	51742521	PME gene family
	Zm00001d040608	3	53284329	53285135	Expansin gene family
	Zm00001d040609	3	53438352	53439161	Expansin gene family
	Zm00001d040649	3	55958222	55960364	UGD, UDP-GlcA decarboxylase, UGE, UXE, GMD
	Zm00001d040650	3	56240764	56246825	UGD, UDP-GlcA decarboxylase, UGE, UXE, GMD
	Zm00001d040667	3	57058571	57062010	PGases gene family
	Zm00001d040702	3	59037273	59044830	Peroxidases gene family
	Zm00001d040705	3	59325157	59327502	Peroxidases gene family
	Zm00001d040724	3	60048141	60062020	GT31 superfamily
	Zm00001d040725	3	60285344	60288098	PME gene family
	Zm00001d040965	3	85292411	85294313	PME gene family
	Zm00001d041181	3	103109494	103111162	GT47 superfamily
	Zm00001d041341	3	113167169	113168502	HCT gene family
	Zm00001d041448	3	120543649	120546836	PAL gene family
	Zm00001d041504	3	124540297	124543804	GT31 superfamily
	Zm00001d041510	3	125020876	125028056	GT8 superfamily
	Zm00001d041600	3	129353827	129354513	UGD, UDP-GlcA decarboxylase, UGE, UXE, GMD
	Zm00001d041679	3	133009146	133013325	PGases gene family
	Zm00001d041827	3	138772336	138774109	Peroxidases gene family
	Zm00001d041972	3	146279425	146282802	CesA/Csl superfamily
	Zm00001d042276	3	158610655	158612902	GT47 superfamily
	Zm00001d042279	3	158645568	158648768	GT47 superfamily
	Zm00001d042281	3	158680072	158683235	GT47 superfamily
	Zm00001d042333	3	161628409	161632125	GT47 superfamily
q4RPR3-2	Zm00001d042538	3	171192760	171203253	PAL gene family
	Zm00001d042556	3	171674280	171676629	PME gene family
	Zm00001d042624	3	174359812	174361198	UGD, UDP-GlcA decarboxylase, UGE, UXE, GMD
	Zm00001d042625	3	174362235	174362897	UGD, UDP-GlcA decarboxylase, UGE, UXE, GMD
	Zm00001d042627	3	174461425	174467990	GT8 superfamily
q4RPR4-1	Zm00001d048865	4	6682746	6684566	C3’H, C4H, F5H
	Zm00001d048870	4	6777461	6778828	HCT gene family
	Zm00001d048871	4	6782856	6784250	HCT gene family
	Zm00001d048872	4	6787107	6788495	HCT gene family
	Zm00001d048875	4	6843103	6844881	C3’H, C4H, F5H
	Zm00001d048954	4	10618189	10622104	PGases gene family
q3RPR4-1	Zm00001d053554	4	228852106	228853621	Peroxidases gene family
	Zm00001d053395	4	229171718	229174509	PME gene family
qRPR4-3	Zm00001d013804	5	20982259	20986759	GT31 superfamily
	Zm00001d013862	5	23180469	23183875	C3’H, C4H, F5H
	Zm00001d014341	5	40561774	40564521	Peroxidases gene family
	Zm00001d014361	5	42781755	42792622	GT31 superfamily
	Zm00001d014467	5	47578824	47582832	Peroxidases gene family
	Zm00001d014481	5	49727067	49734313	CCR gene family
Cluster-RPR5-2	Zm00001d015129	5	76648261	76651007	PME gene family
	Zm00001d015409	5	88962266	88972559	CesA/Csl superfamily
	Zm00001d015459	5	91459227	91463857	4CL gene family
	Zm00001d015513	5	94710366	94713355	CCR gene family
	Zm00001d015600	5	100360950	100370156	GT47 superfamily
	Zm00001d015618	5	101493553	101498009	CAD gene family
	Zm00001d015820	5	123889597	123890257	PME gene family
	Zm00001d015821	5	123917296	123923030	PME gene family
	Zm00001d015825	5	124310981	124316460	PME gene family
	Zm00001d015934	5	132637131	132639444	UGD, UDP-GlcA decarboxylase, UGE, UXE, GMD
	Zm00001d015956	5	134163807	134172264	CCR gene family
	Zm00001d015977	5	135998432	136000046	XTH superfamily
	Zm00001d016022	5	140073262	140074557	Expansin gene family
	Zm00001d016024	5	140140315	140141621	Expansin gene family
	Zm00001d016025	5	140150560	140151594	Expansin gene family
	Zm00001d016027	5	140214744	140215966	Expansin gene family
	Zm00001d016035	5	140762380	140763279	Expansin gene family
	Zm00001d016054	5	141752732	141753952	Expansin gene family
	Zm00001d016056	5	141858401	141859443	Expansin gene family
	Zm00001d016177	5	145215467	145216705	Peroxidases gene family
	Zm00001d016179	5	145337598	145338959	Peroxidases gene family
	Zm00001d016182	5	145508567	145510366	Peroxidases gene family
	Zm00001d016185	5	145524164	145526605	Peroxidases gene family
q2RPR6-1	Zm00001d037784	6	137680490	137684176	PGases gene family
	Zm00001d037849	6	139653712	139656071	C3’H, C4H, F5H
q4RPR6-1	Zm00001d038339	6	154855075	154855869	PGases gene family
	Zm00001d038371	6	155675685	155678583	Laccases gene family
	Zm00001d038598	6	156550363	156552050	Peroxidases gene family
	Zm00001d038599	6	156591058	156593132	Peroxidases gene family
	Zm00001d038476	6	158313985	158316132	Expansin gene family
Cluster-RPR6-1	Zm00001d038555	6	159789930	159794329	C3’H, C4H, F5H
	Zm00001d038676	6	162387696	162391572	CesA/Csl superfamily
Cluster-RPR7-1	Zm00001d021533	7	150019755	150021283	Peroxidases gene family
	Zm00001d021586	7	157210992	157212103	CesA/Csl superfamily
	Zm00001d021667	7	159561272	159563354	XTH superfamily
	Zm00001d021731	7	161606806	161611416	CesA/Csl superfamily
	Zm00001d021732	7	161616775	161621032	CesA/Csl superfamily
	Zm00001d021736	7	161769376	161772570	CesA/Csl superfamily
q2RPR8-1	Zm00001d012433	8	174376458	174380066	PGases gene family
Cluster-RPR9-1	Zm00001d044775	9	2067198	2068863	XTH superfamily
	Zm00001d044776	9	2120385	2121582	XTH superfamily
	Zm00001d044823	9	3919975	3927274	GT31 superfamily
	Zm00001d044828	9	4249799	4253170	GT8 superfamily
q4RPR9-2	Zm00001d045792	9	39400431	39401891	Expansin gene family
	Zm00001d045845	9	41753289	41754945	Peroxidases gene family
	Zm00001d045846	9	41760218	41761836	Peroxidases gene family
	Zm00001d045861	9	44259518	44260979	Expansin gene family
	Zm00001d045974	9	51114232	51116210	PME gene family
	Zm00001d046007	9	53772068	53773355	XTH superfamily
	Zm00001d046014	9	54568465	54572112	CesA/Csl superfamily
	Zm00001d046187	9	59829875	59831505	Peroxidases gene family
	Zm00001d046186	9	59840503	59842682	Peroxidases gene family
	Zm00001d046184	9	59939835	59941693	Peroxidases gene family
	Zm00001d046127	9	65021435	65026154	CesA/Csl superfamily
	Zm00001d046035	9	72700927	72702134	Peroxidases gene family
	Zm00001d046330	9	80614574	80620113	Laccases gene family
	Zm00001d046333	9	81219767	81228535	CCR gene family
	Zm00001d046416	9	88220986	88223951	C3’H, C4H, F5H
	Zm00001d046443	9	90212050	90214624	CesA/Csl superfamily
Cluster-RPR10-1	Zm00001d023810	10	22804035	22808448	CesA/Csl superfamily
	Zm00001d023813	10	22948296	22951424	PME gene family
	Zm00001d024071	10	41457090	41458519	XTH superfamily
	Zm00001d024119	10	45703065	45705134	Peroxidases gene family
	Zm00001d024120	10	47326176	47327585	COMT gene family
	Zm00001d024178	10	53430604	53434813	CesA/Csl superfamily
	Zm00001d024231	10	58449887	58454061	CCR gene family
	Zm00001d024308	10	63095796	63097455	UGD, UDP-GlcA decarboxylase, UGE, UXE, GMD
	Zm00001d024314	10	63672420	63675196	CAD gene family
	Zm00001d024378	10	68054718	68056244	XTH superfamily
	Zm00001d024379	10	68164948	68165808	XTH superfamily
	Zm00001d024382	10	68270859	68272288	XTH superfamily
	Zm00001d024386	10	68324451	68325959	XTH superfamily
	Zm00001d024392	10	68477775	68478941	XTH superfamily
	Zm00001d024515	10	75531512	75533071	C3’H, C4H, F5H
	Zm00001d024531	10	76628321	76635128	CesA/Csl superfamily
	Zm00001d024574	10	78836368	78838011	C3’H, C4H, F5H
	Zm00001d024734	10	85640717	85645627	Peroxidases gene family
	Zm00001d024738	10	85745269	85746584	Peroxidases gene family
	Zm00001d024740	10	85753988	85755325	Peroxidases gene family
	Zm00001d024747	10	85855902	85857817	Peroxidases gene family
	Zm00001d024745	10	85904372	85906044	Peroxidases gene family
	Zm00001d024752	10	86099715	86100737	Peroxidases gene family
	Zm00001d024753	10	86284199	86285519	Peroxidases gene family
	Zm00001d024776	10	87350836	87353261	CesA/Csl superfamily
Note: The genes marked in yellow are less than 500kb in physical distance from the corresponding QTL peak.
